# Supplementary material for: Pentacyclic triterpenoid acids in Styrax as potent and highly specific inhibitors against human carboxylesterase 1A
Source: Royal Society of Chemistry journal article supplement (doi:10.1039/d0fo01732a), 2020-01-01
Supplement: d0fo01732a1.pdf [file d0fo01732a1.pdf]

## Supplementary Materials

*for*

### **Pentacyclic triterpenoid acids in *Styrax* as potent and highly specific inhibitors against human carboxylesterase 1A**

Lu Wang <sup>a, b, 1</sup>, Xiao-Qing Guan <sup>a, 1</sup>, Yun-Qing Song <sup>a</sup>, Rong-Jing He <sup>a</sup>, Wei-Wei Qin <sup>c</sup>, Yuan Xiong <sup>b</sup>, Peng-Chao Huo <sup>a</sup>, Feng Zhang <sup>a</sup>, Pei Fang Song <sup>a</sup>, Li-Wei Zou <sup>a</sup>, Shou-Ning Jia <sup>d</sup>, Hui Tang <sup>b\*</sup>, Guang-Bo Ge <sup>a\*</sup>

<sup>a</sup> Institute of Interdisciplinary Integrative Medicine Research, Shanghai University of Traditional Chinese Medicine, Shanghai, 201203, China.

<sup>b</sup> Key Laboratory of Xinjiang Phytomedicine Resource and Utilization, Ministry of Education, Pharmacy School of Shihezi University, Xinjiang 832000, China.

<sup>c</sup> Department of Pharmacy, Huashan Hospital, Fudan University, Shanghai, China.

<sup>d</sup> Qinghai Hospital of Traditional Chinese Medicine, Xining 810000, China

\*Corresponding author.

E-mail address: geguangbo@dicp.ac.cn (G.B. Ge)

E-mail address: Th\_pha@shzu.edu.cn (Hui Tang)

<sup>1</sup> These authors contributed equally to this work.

This file contains one supplementary table and twenty-one supplementary figures

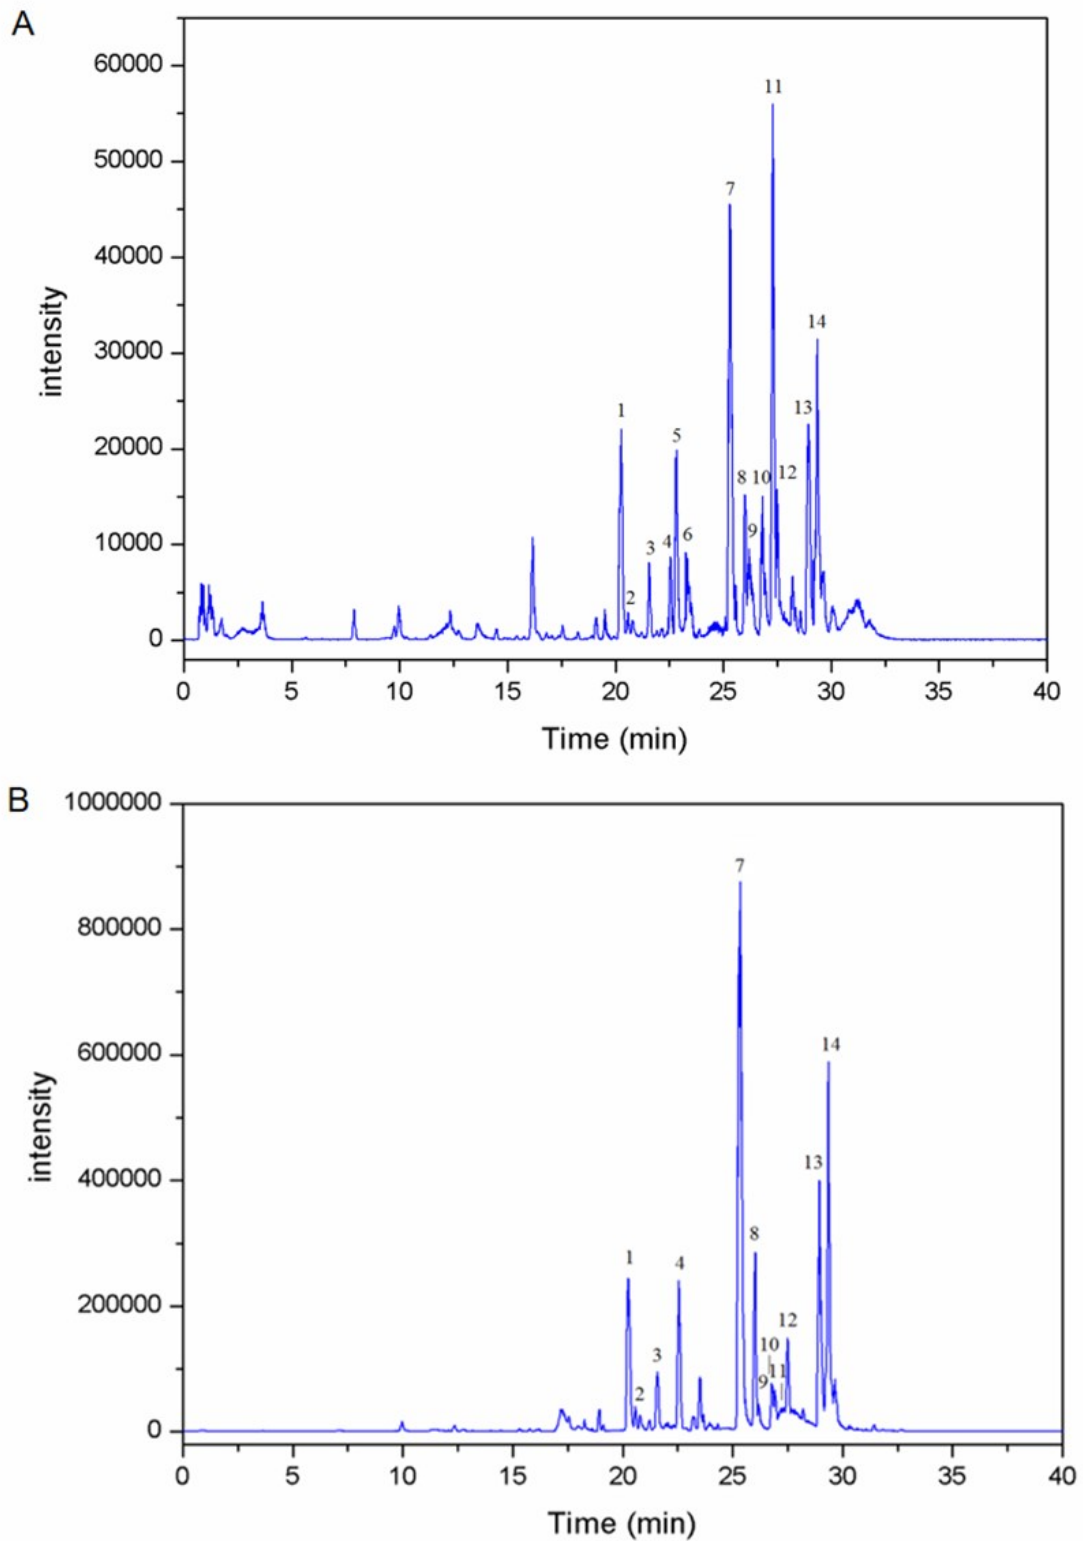

**Fig. S1** Total ion chromatograph of styrax bioactive fraction (25-35 min) in positive ion mode (A) and negative ion mode (B).

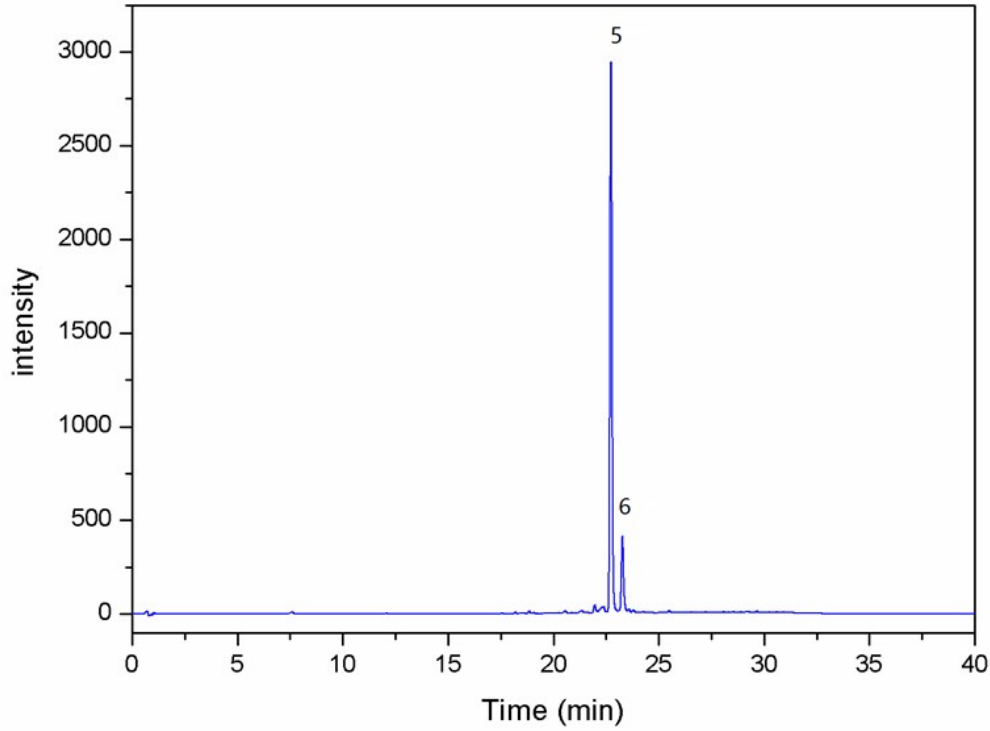

Fig. S2 LC-UV fingerprinting of styrax bioactive fraction (25-35 min) monitored at 254 nm.

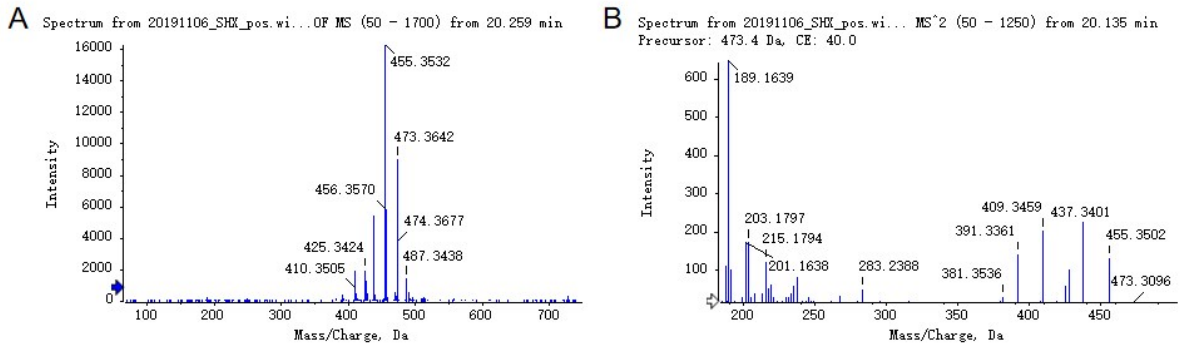

Fig. S3 MS<sup>1</sup> (A) and MS<sup>2</sup> (B) spectrum of compound 1.

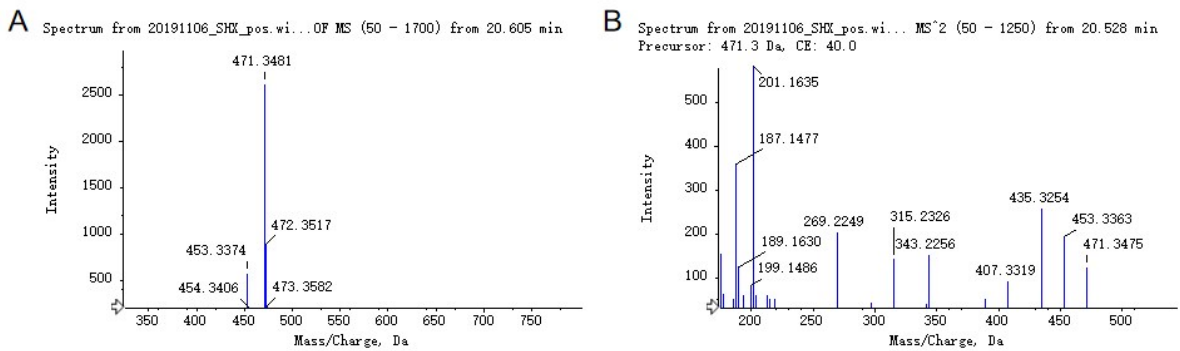

Fig. S4 MS<sup>1</sup> (A) and MS<sup>2</sup> (B) spectrum of compound 2.

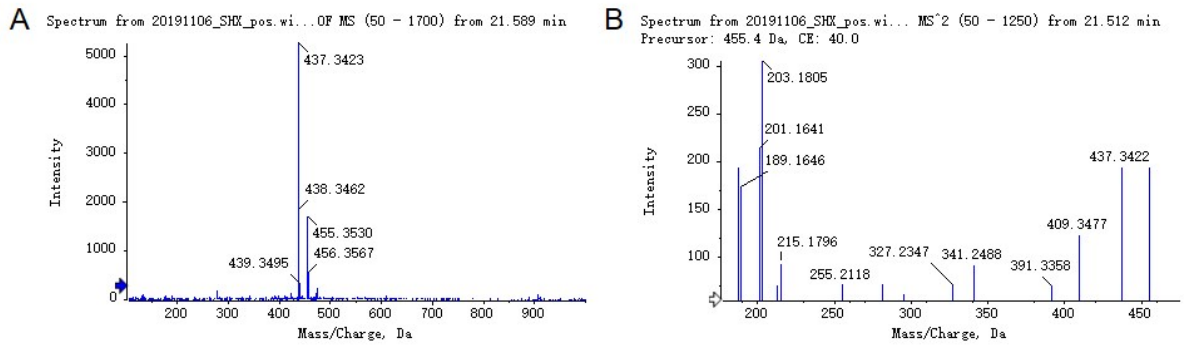

**Fig. S5** MS<sup>1</sup> (A) and MS<sup>2</sup> (B) spectrum of compound 3.

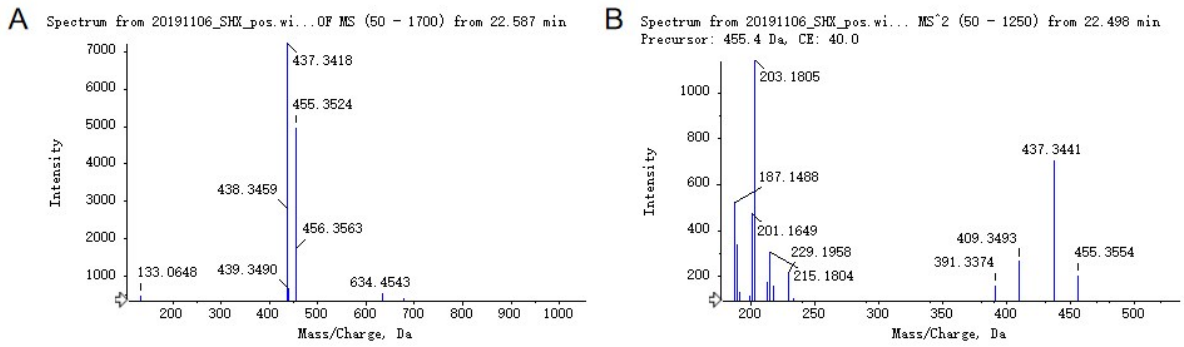

**Fig. S6** MS<sup>1</sup> (A) and MS<sup>2</sup> (B) spectrum of compound 4.

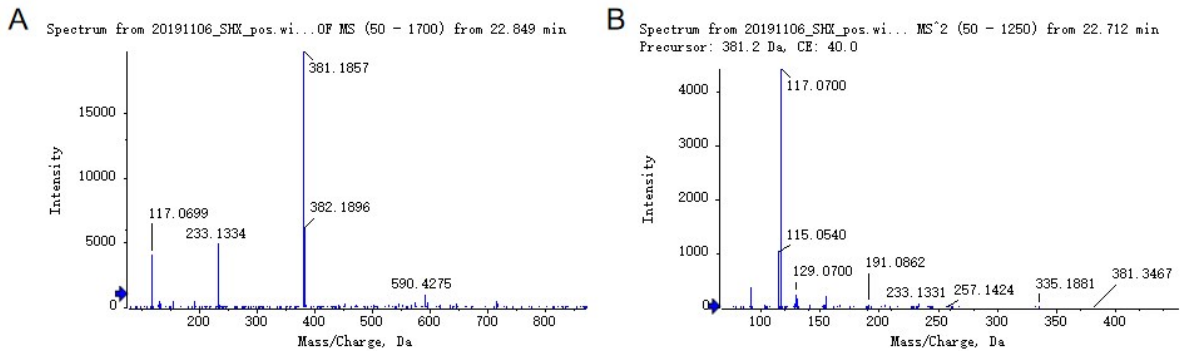

**Fig. S7** MS<sup>1</sup> (A) and MS<sup>2</sup> (B) spectrum of compound 5.

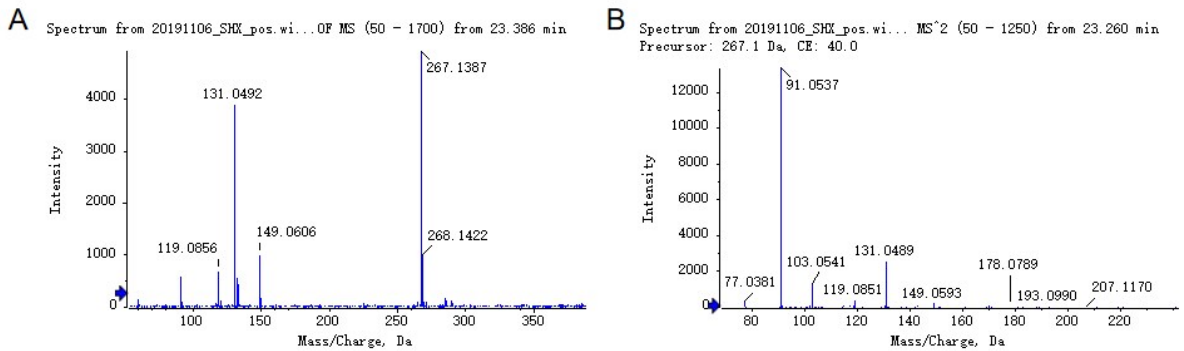

**Fig. S8** MS<sup>1</sup> (A) and MS<sup>2</sup> (B) spectrum of compound 6.

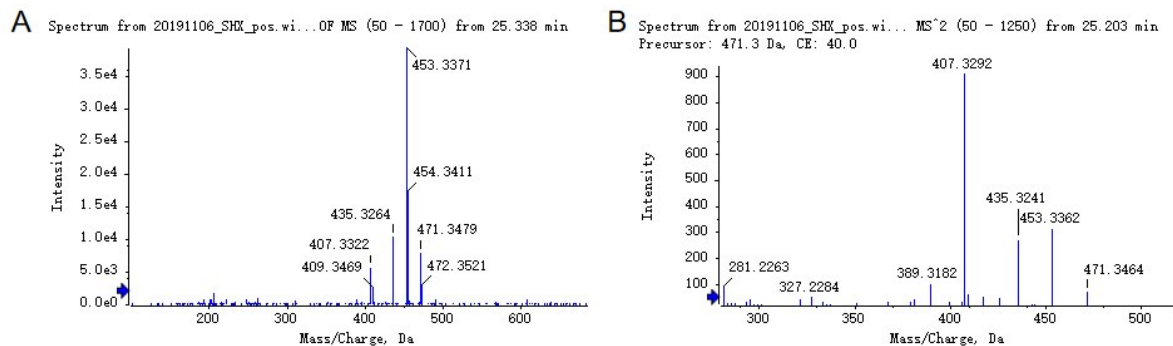

**Fig. S9** MS<sup>1</sup> (A) and MS<sup>2</sup> (B) spectrum of compound 7.

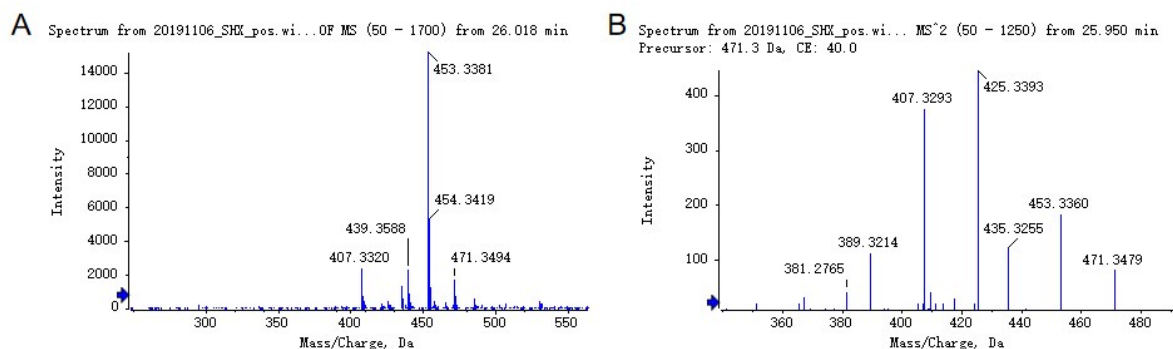

**Fig. S10** MS<sup>1</sup> (A) and MS<sup>2</sup> (B) spectrum of compound 8.

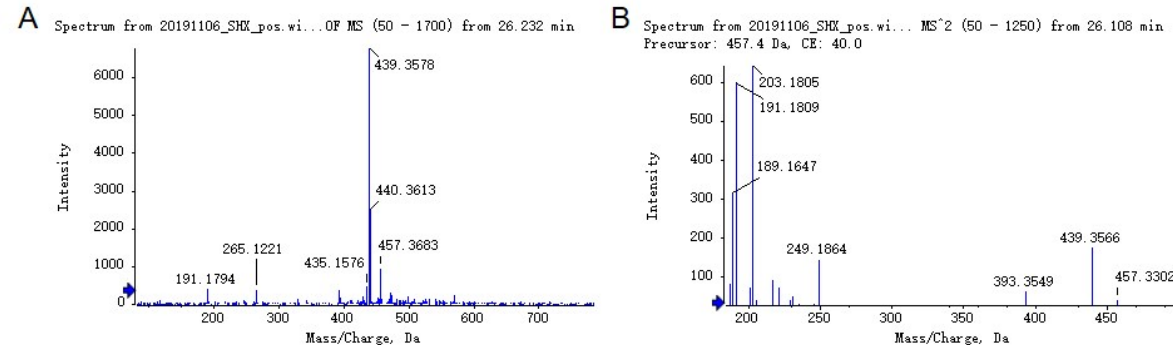

**Fig. S11** MS<sup>1</sup> (A) and MS<sup>2</sup> (B) spectrum of compound 9.

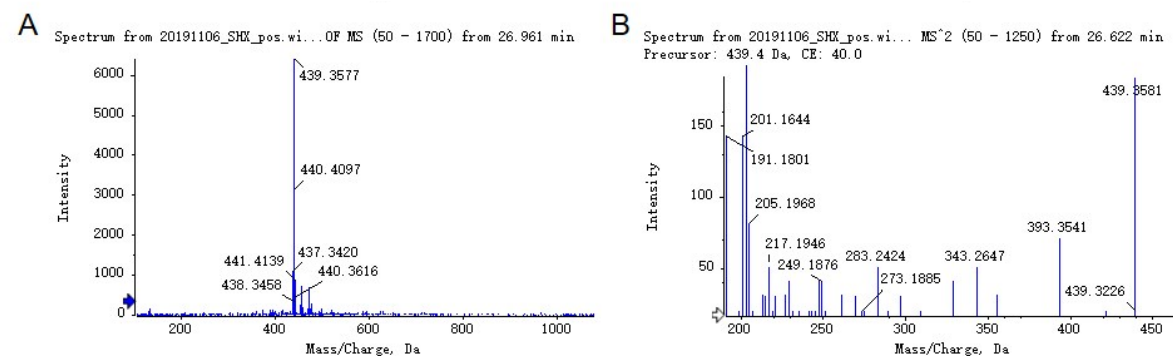

**Fig. S12** MS<sup>1</sup> (A) and MS<sup>2</sup> (B) spectrum of compound 10.

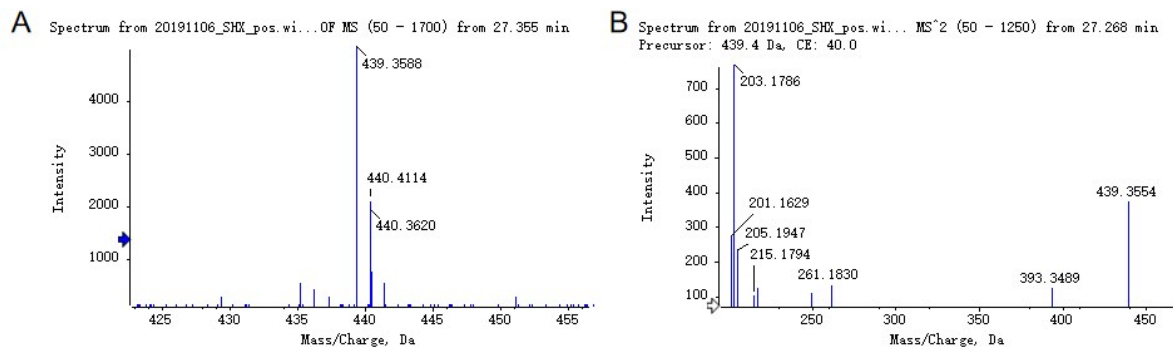

**Fig. S13** MS<sup>1</sup> (A) and MS<sup>2</sup> (B) spectrum of compound 11.

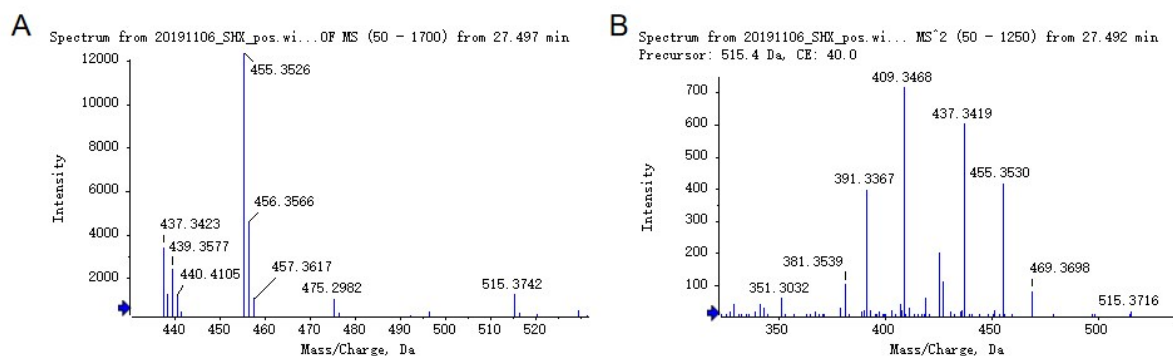

**Fig. S14** MS<sup>1</sup> (A) and MS<sup>2</sup> (B) spectrum of compound 12.

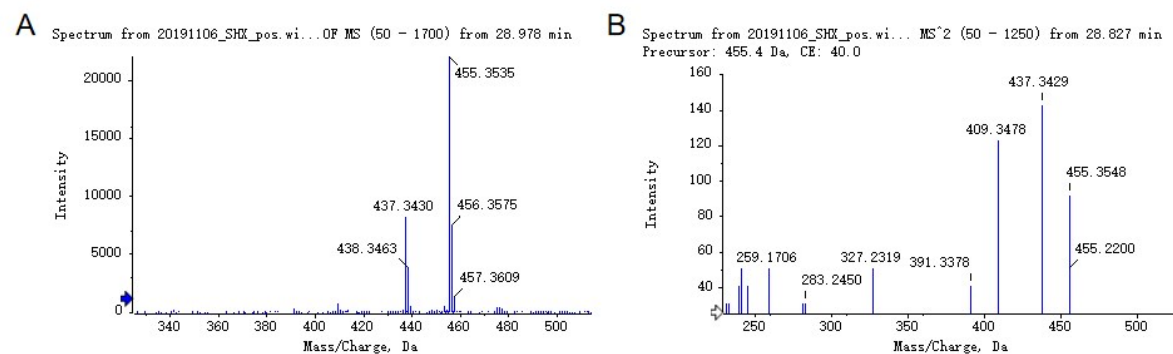

**Fig. S15** MS<sup>1</sup> (A) and MS<sup>2</sup> (B) spectrum of compound 13.

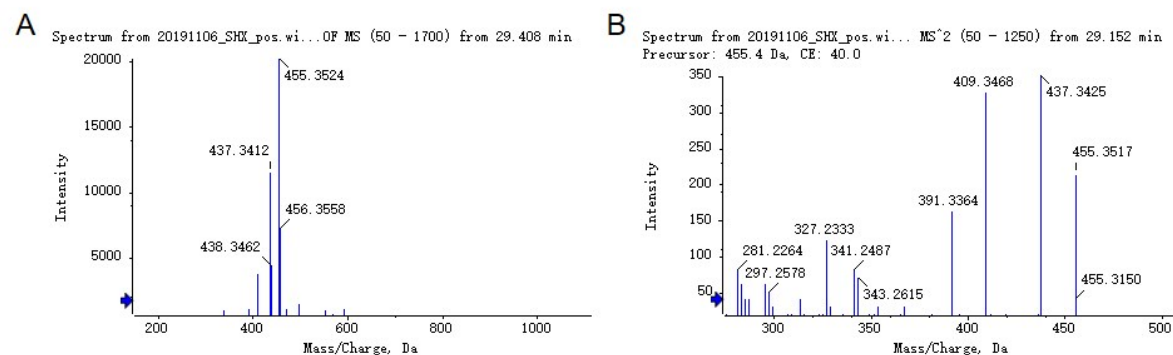

**Fig. S16** MS<sup>1</sup> (A) and MS<sup>2</sup> (B) spectrum of compound 14.

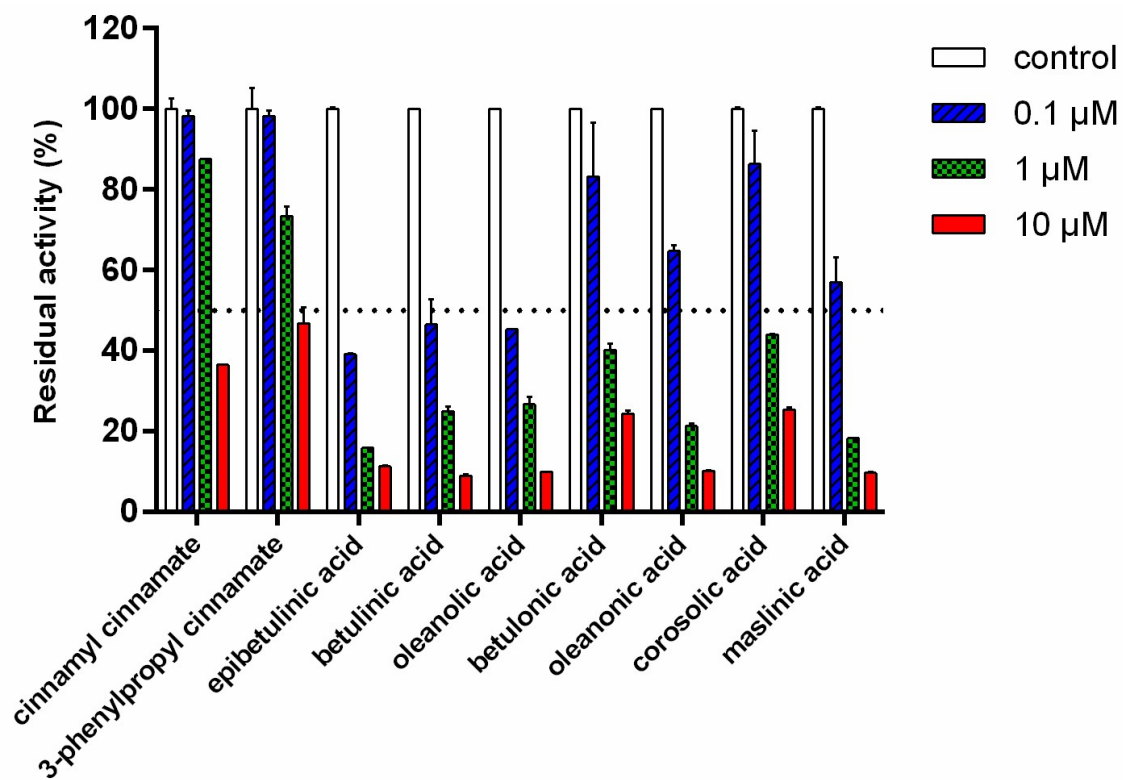

**Fig. S17** Inhibitory effects of nine major constituents in the bioactive fraction from *Styrax* against hCES1A-mediated DME hydrolysis in HLM. Data are expressed as mean  $\pm$  SD.

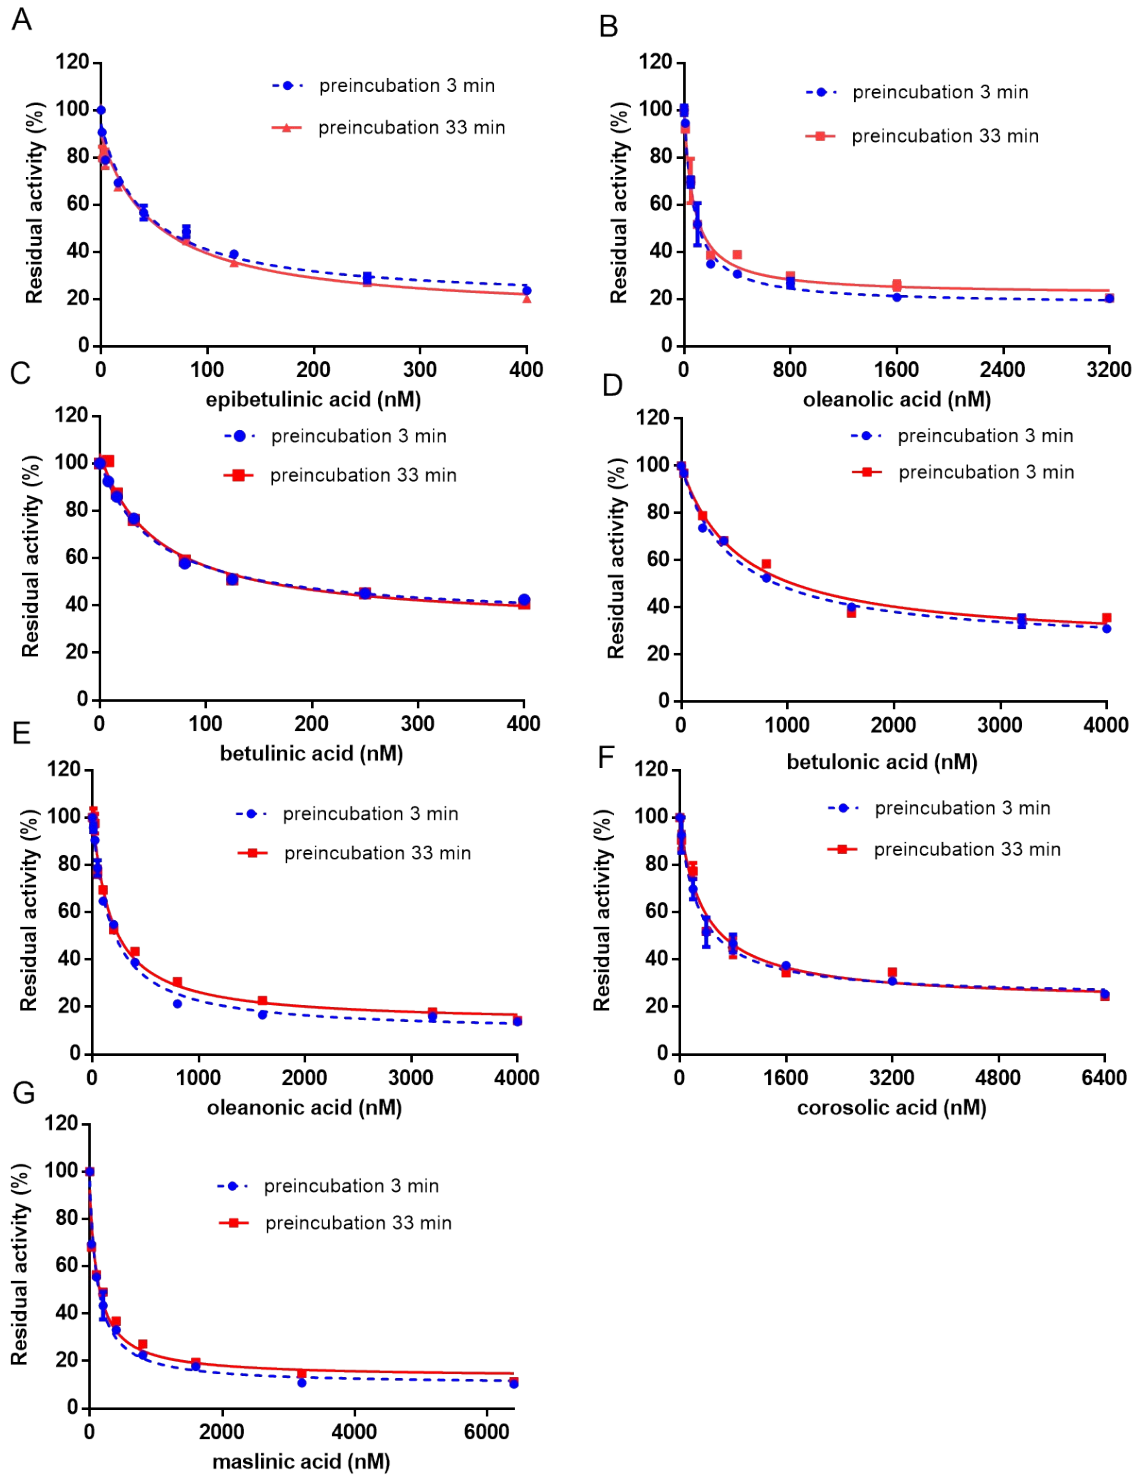

**Fig. S18** Inhibition of hCES1A-mediated DME hydrolysis by epibetulinic acid (A), oleanolic acid (B), betulonic acid (C), betulonic acid (D), oleanolic acid (E), corosolic acid (F) or maslinic acid (G) with different preincubation times. All data were shown as mean  $\pm$  SD.



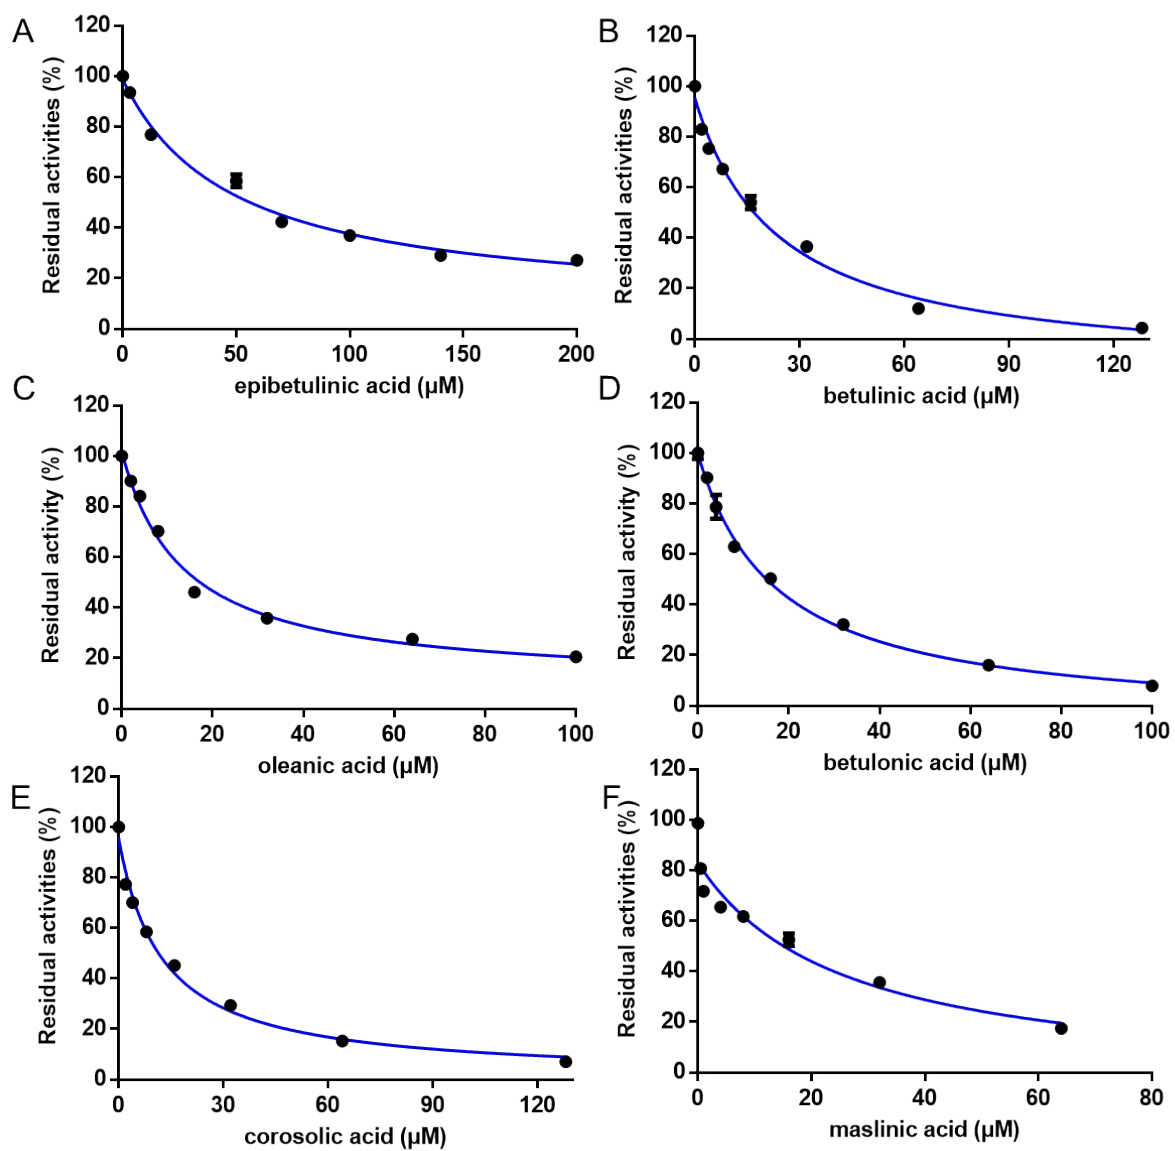

**Fig. S19** Dose-inhibition curves of epibetulinic acid (A), betulinic acid (B), oleanonic acid (C), betulonic acid (D), corosolic acid (E) or maslinic acid (F) against hCES2A-mediated NCEN hydrolysis. All data were shown as mean  $\pm$  SD.

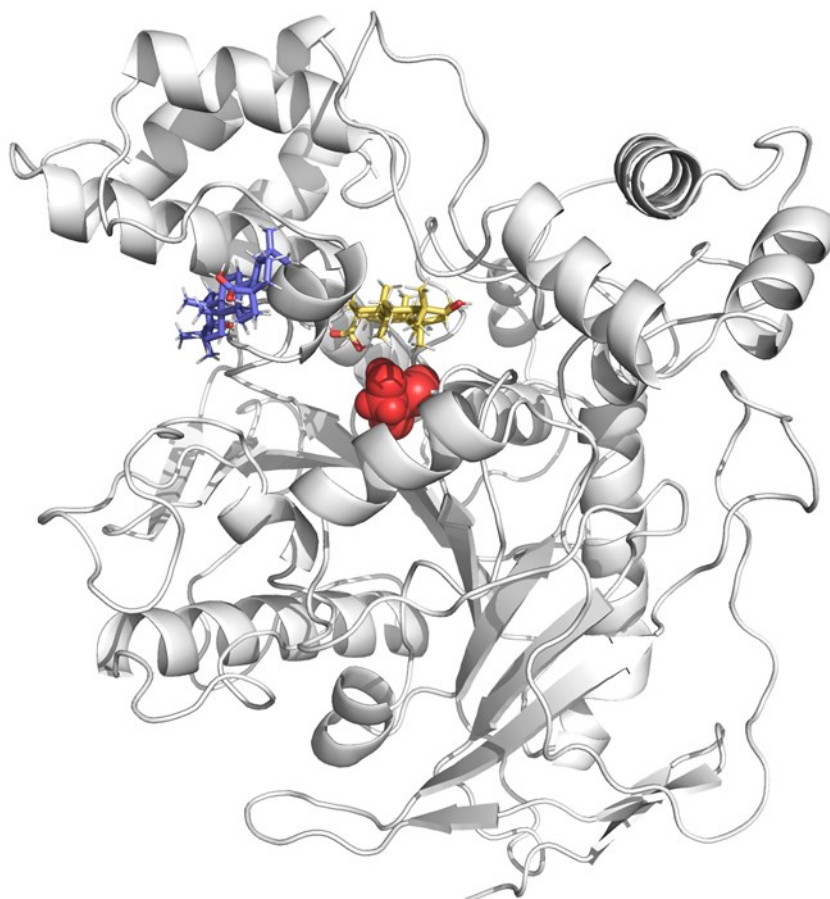

**Fig. S20** Molecular docking simulations of epibetulinic acid into the crystal structure of hCES1A1 (PDB ID: 1MX5) by Autodock Vina. Two different binding modes with the lowest binding energy was presented in Site A (yellow) with -9.5 kcal/mol and Site B (blue) with -7.3 kcal/mol. The active site Ser221 was presented as red spheres.

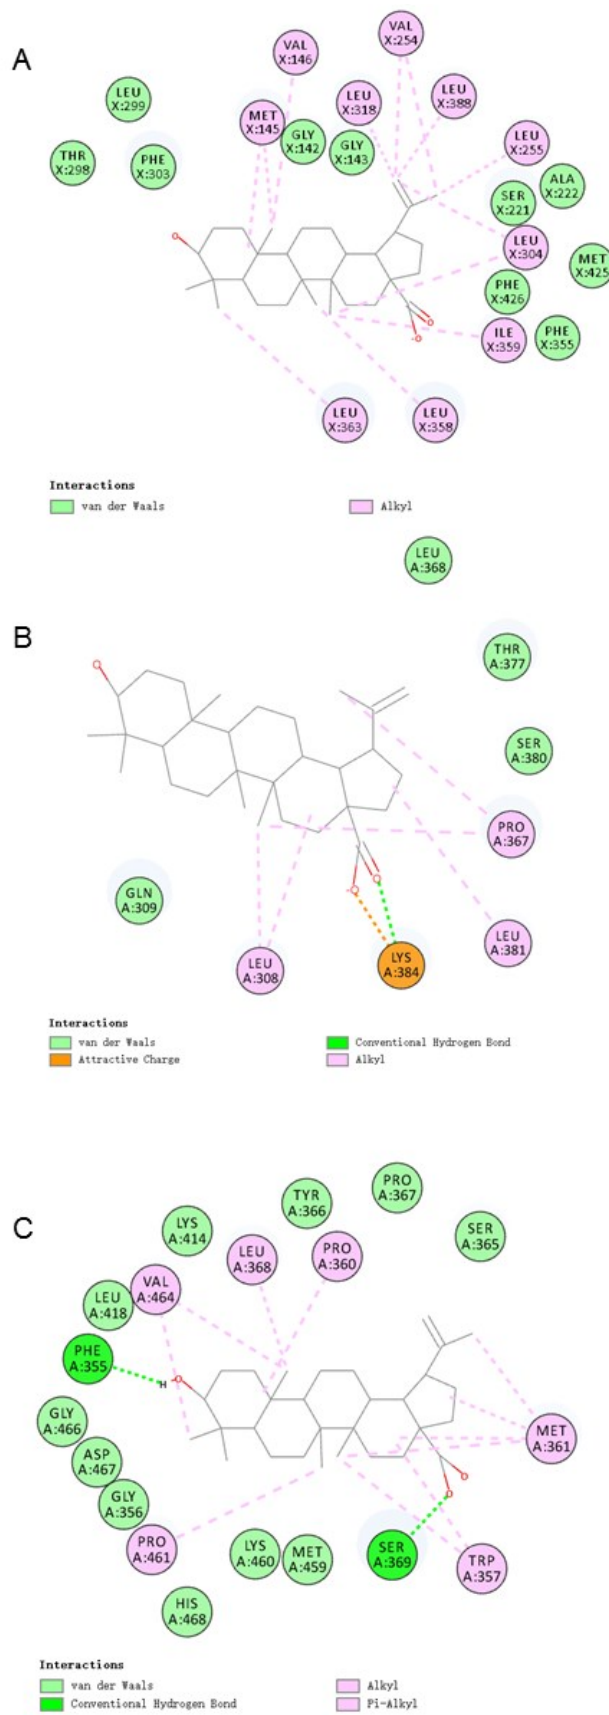

**Fig. S21** The detailed 2D interactions between epibetulinic acid and the surrounding amino acids in Site I (A), Site II (B) and Site III (C) of hCES1A.

**Table S1** Identification and characterization of major constituents with potent hCES1A inhibitory effect in styrax by using LC-TOF-MS/MS.

| Peak | t <sub>R</sub> (min) | Ionization                          | Observed<br>m/z | ppm | Formula                                        | Identification                                                  | Fragment<br>ions                       |
|------|----------------------|-------------------------------------|-----------------|-----|------------------------------------------------|-----------------------------------------------------------------|----------------------------------------|
| 1    | 20.26                | [M+H] <sup>+</sup>                  | 473.3641        | 2.5 | C <sub>30</sub> H <sub>48</sub> O <sub>4</sub> | Maslinic acid                                                   | 473.3096, 437.3401, 391.3361, 203.1797 |
| 2    | 20.59                | [M+H] <sup>+</sup>                  | 471.3482        | 1.9 | C <sub>30</sub> H <sub>46</sub> O <sub>4</sub> | 3-oxo-12 $\alpha$ -hydroxy-olean-28,13 $\beta$ -olide or isomer | 471.3475, 453.3363, 435.3254, 343.2256 |
| 3    | 21.57                | [M+H-H <sub>2</sub> O] <sup>+</sup> | 455.3528        | 1.4 | C <sub>30</sub> H <sub>48</sub> O <sub>4</sub> | Corosolic acid                                                  | 455.3536, 409.3477, 391.3358, 203.1805 |
| 4    | 22.56                | [M+H-H <sub>2</sub> O] <sup>+</sup> | 455.3531        | 1.6 | C <sub>30</sub> H <sub>48</sub> O <sub>4</sub> | 3 $\alpha$ , 25-Dihydroxy-olean-12-en-28-oic acid               | 455.3554, 437.3441, 391.3374, 203.1805 |
| 5    | 22.81                | /                                   | 381.1856        | /   | C <sub>18</sub> H <sub>16</sub> O <sub>2</sub> | Cinnamyl cinnamate                                              | 381.3467, 155.0856, 129.0700, 117.0700 |
| 6    | 23.36                | [M+H] <sup>+</sup>                  | 267.1391        | 2.8 | C <sub>18</sub> H <sub>18</sub> O <sub>2</sub> | 3-phenylpropyl cinnamate                                        | 149.0593, 131.0489, 119.0581, 103.0541 |
| 7    | 25.34                | [M+H] <sup>+</sup>                  | 471.3478        | 2.4 | C <sub>30</sub> H <sub>46</sub> O <sub>4</sub> | 3-oxo-12 $\alpha$ -hydroxy-olean-28,13 $\beta$ -olide or isomer | 471.3464, 435.3241, 389.3182, 187.1474 |
| 8    | 26.02                | [M+H] <sup>+</sup>                  | 471.3473        | 2.1 | C <sub>30</sub> H <sub>46</sub> O <sub>4</sub> | 3-oxo-12 $\alpha$ -hydroxy-olean-28,13 $\beta$ -olide or isomer | 471.3479, 435.3255, 425.3393, 389.3214 |
| 9    | 26.20                | [M+H] <sup>+</sup>                  | 457.3683        | 1.7 | C <sub>30</sub> H <sub>48</sub> O <sub>3</sub> | Epibetulinic acid                                               | 457.3302, 393.3549, 249.1864, 191.1809 |
| 10   | 26.95                | [M+H-H <sub>2</sub> O] <sup>+</sup> | 439.3580        | 2.1 | C <sub>30</sub> H <sub>48</sub> O <sub>3</sub> | Betulinic acid                                                  | 439.3568, 421.3433, 393.3541, 249.1849 |
| 11   | 27.30                | [M+H-H <sub>2</sub> O] <sup>+</sup> | 439.3594        | 2.4 | C <sub>30</sub> H <sub>48</sub> O <sub>3</sub> | Oleanolic acid                                                  | 439.3554, 393.3489, 203.1786           |
| 12   | 27.52                | [M+H] <sup>+</sup>                  | 515.3744        | 1.9 | C <sub>32</sub> H <sub>50</sub> O <sub>5</sub> | 3 $\alpha$ -acetoxy-25-hydroxy-olean-12-en-28-oic acid          | 515.3716, 437.3419, 391.3367, 203.1797 |
| 13   | 28.97                | [M+H] <sup>+</sup>                  | 455.3528        | 2.3 | C <sub>30</sub> H <sub>46</sub> O <sub>3</sub> | Betulonic acid                                                  | 455.3548, 437.3429, 409.3478, 391.3378 |
| 14   | 29.41                | [M+H] <sup>+</sup>                  | 455.3535        | 1.4 | C <sub>30</sub> H <sub>46</sub> O <sub>3</sub> | Oleanonic acid                                                  | 455.3517, 437.3425, 409.3468, 391.3364 |

**Table S2** The inhibition kinetic parameters of seven constituents from *Styrax* against hCES1A-mediated DME hydrolysis.

| Inhibitor name    | Inhibitor concentration (nM) | $V_{max}$ (pmol/min/mg protein) | $K_m$ ( $\mu$ M) | Linear fit equations | $R^2$ |
|-------------------|------------------------------|---------------------------------|------------------|----------------------|-------|
| None              | 0                            | 5.078                           | 4.677            | -                    | -     |
| epibetulinic acid | 16                           | 5.088                           | 5.040            | $Y=0.0184X+1.358$    | 0.99  |
| betulinic acid    | 32                           | 4.788                           | 6.312            | $Y=0.0179X+1.272$    | 0.98  |
| oleanolic acid    | 20                           | 4.896                           | 7.929            | $Y=0.0150X+1.575$    | 0.98  |
| betulonic acid    | 400                          | 3.916                           | 5.347            | $Y=0.0015X+1.323$    | 0.99  |
| oleanonic acid    | 80                           | 4.130                           | 6.501            | $Y=0.0067X+1.384$    | 0.98  |
| corosolic acid    | 800                          | 3.315                           | 2.302            | $Y=0.0005X+0.338$    | 0.97  |
| maslinic acid     | 100                          | 3.410                           | 4.310            | $Y=0.0021X+0.701$    | 0.99  |
